# Supplementary material for: The electronic and magnetic properties modulated by ferroelectric polarization switching in two-dimensional VSeTe/Sc2CO2 van der Waals heterostructures
Source: Royal Society of Chemistry journal article supplement (doi:10.1039/d4cp01840k), 2024-01-01
Supplement: d4cp01840k1.pdf [file d4cp01840k1.pdf]

## Supporting Information

### **The electronic and magnetic properties modulated by ferroelectric polarization switching in two-dimensional VSeTe/Sc<sub>2</sub>CO<sub>2</sub> van der Waals heterostructure**

Weiyang Yu,<sup>1,\*</sup> Xiaoli Zhang,<sup>1</sup> Yuling Zhang,<sup>1</sup> Yali Wu,<sup>1</sup> Rui Li,<sup>1</sup> Wei-Bing Zhang<sup>2, †</sup>

<sup>1</sup> School of Physics and Electronic Information Engineering, Henan Polytechnic University, Jiaozuo, 454000, Henan, China

<sup>2</sup> Hunan Provincial Key Laboratory of Flexible Electronic Materials Genome Engineering, Changsha University of Science and Technology, Changsha, 410114, Hunan, China

Corresponding authors: \*yuweiyang@hpu.edu.cn; †zhangwb@csust.edu.cn

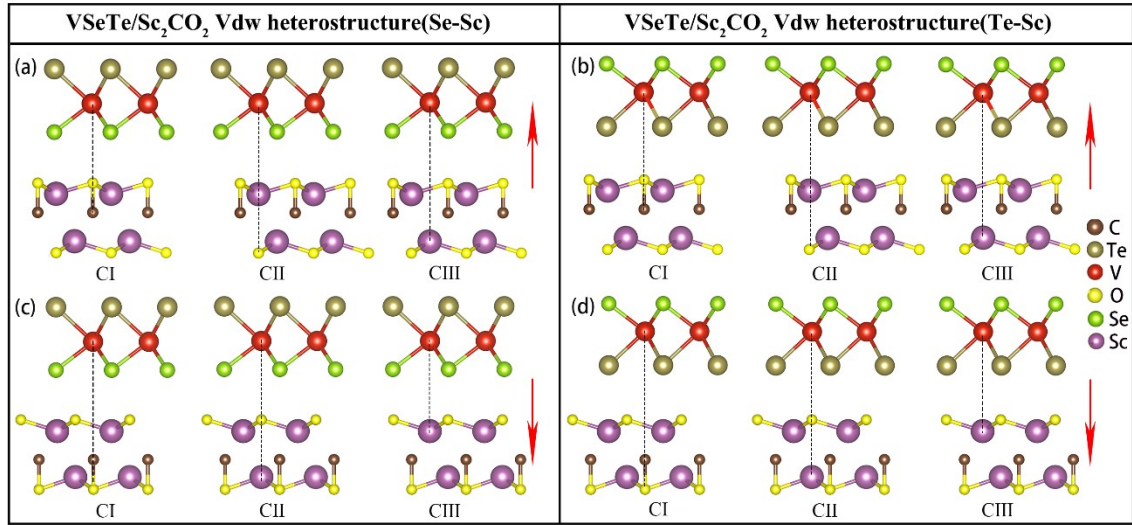

**Fig. S1** 12 kinds of heterogeneous structural types. Among them, (a) and (b) are three highly symmetric configurations with ferroelectric polarization upward of Se-Sc and Te-Sc as the contact surface; (c) and (d) are three highly symmetrical configurations with ferroelectric polarization downward of Se-Sc and Te-Sc as the contact surface.

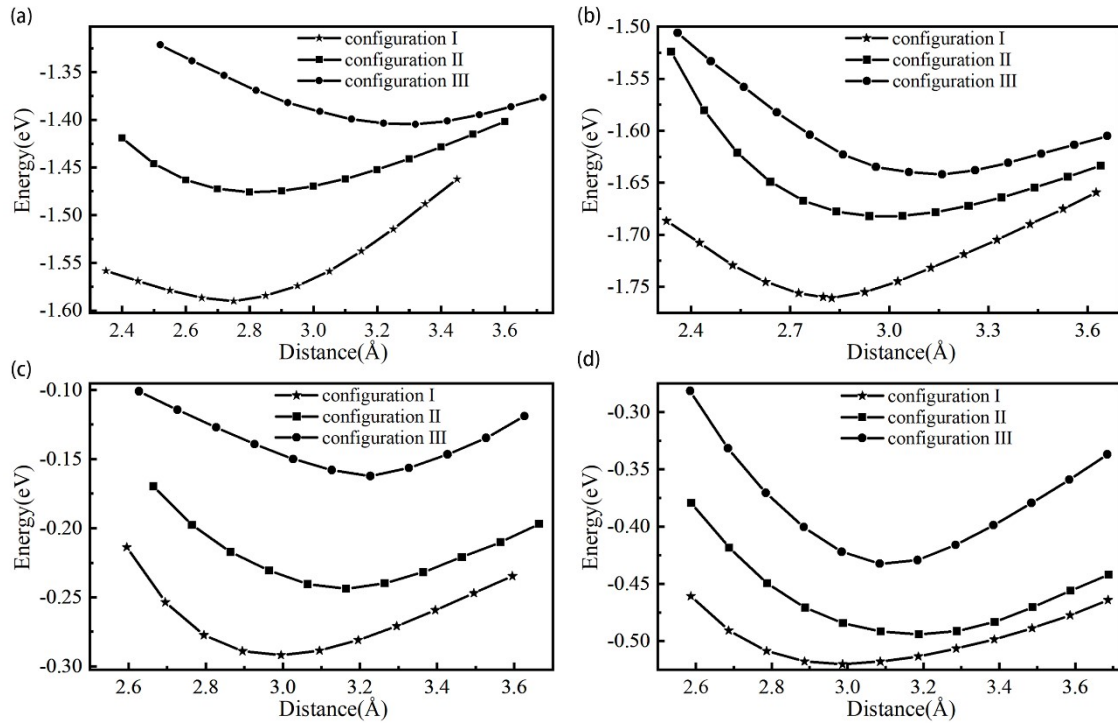

**Fig. S2** Relationship between layer spacing and energy of 12 kinds of configurations. Where (a) and (b) are ferroelectric polarization upward and downward heterostructure with Se-Sc as contact surface, respectively. (c) and (d) represent the upward and downward heterostructure

of ferroelectric polarization with Te-Sc as the contact surface, respectively. Star, square and round dots represent CI, CII and CIII configurations, respectively.

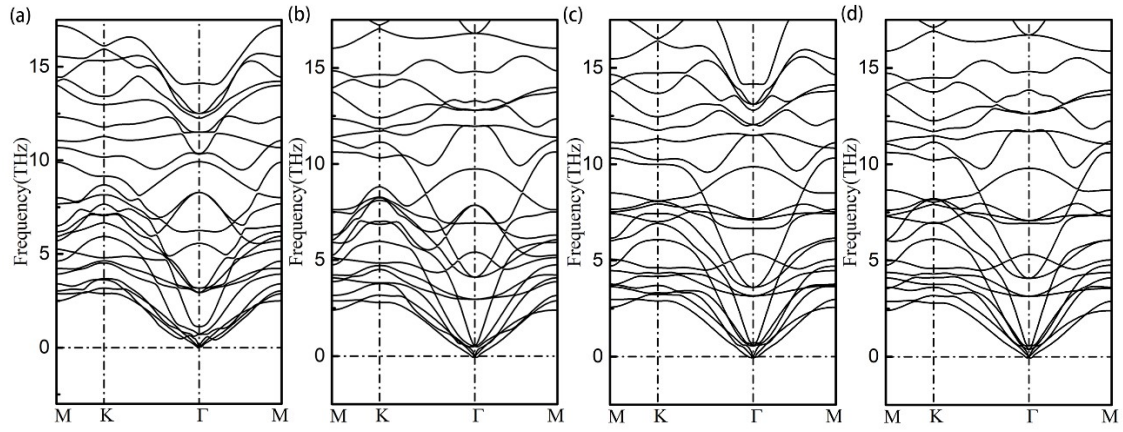

**Fig. S3** Phonon spectra corresponding to the four lowest energy configurations: (a) VSeTe/Sc<sub>2</sub>CO<sub>2</sub> (Se-Sc↑), (b) VSeTe/Sc<sub>2</sub>CO<sub>2</sub> (Se-Sc↓), (c) VSeTe/Sc<sub>2</sub>CO<sub>2</sub> (Te-Sc↑), (d) VSeTe/Sc<sub>2</sub>CO<sub>2</sub> (Te-Sc↓).

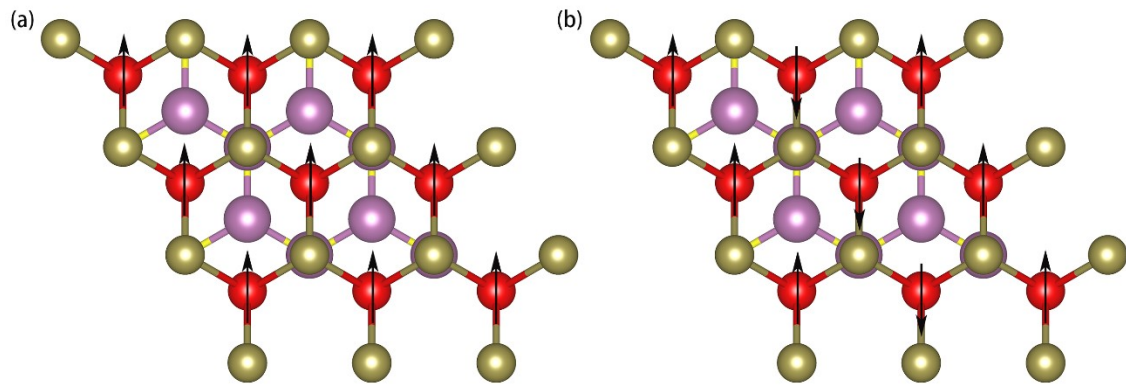

**Fig. S4** Ferromagnetic configurations of VSeTe/Sc<sub>2</sub>CO<sub>2</sub> (Se-Sc↑) heterostructure with (a) ferromagnetic and (b) antiferromagnetic configuration.



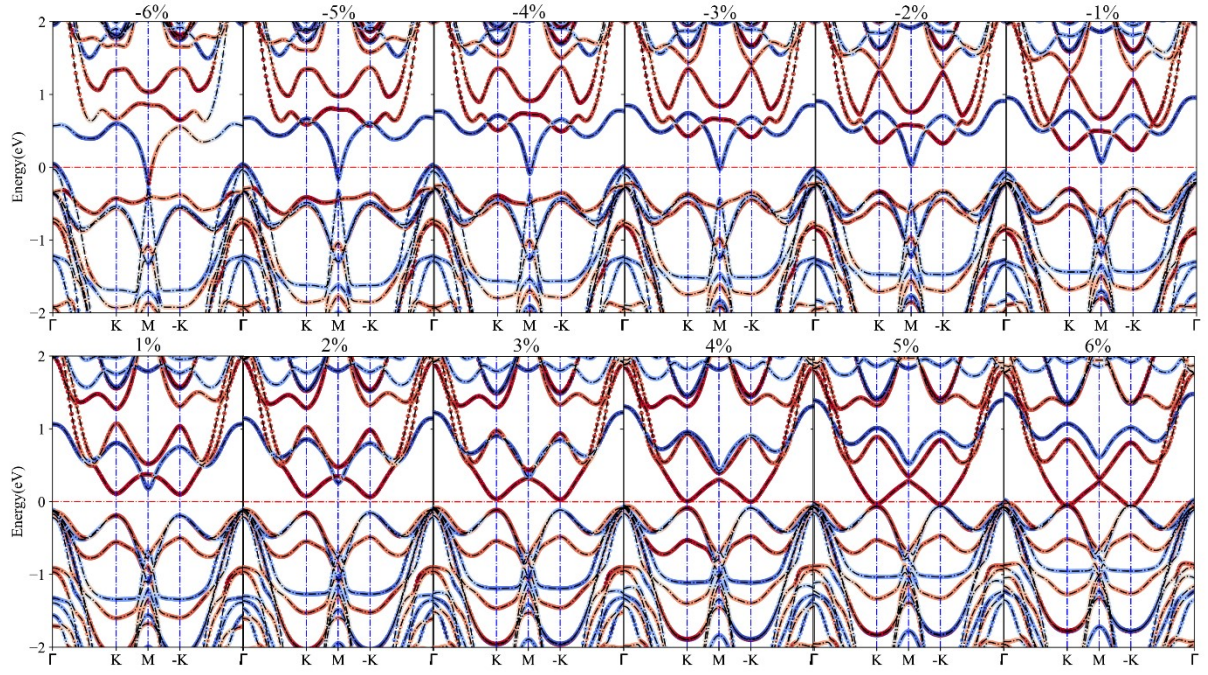

**Fig. S5** Band structures of VSeTe/Sc<sub>2</sub>CO<sub>2</sub> (Se-Sc↓) heterostructures regulated by strain.

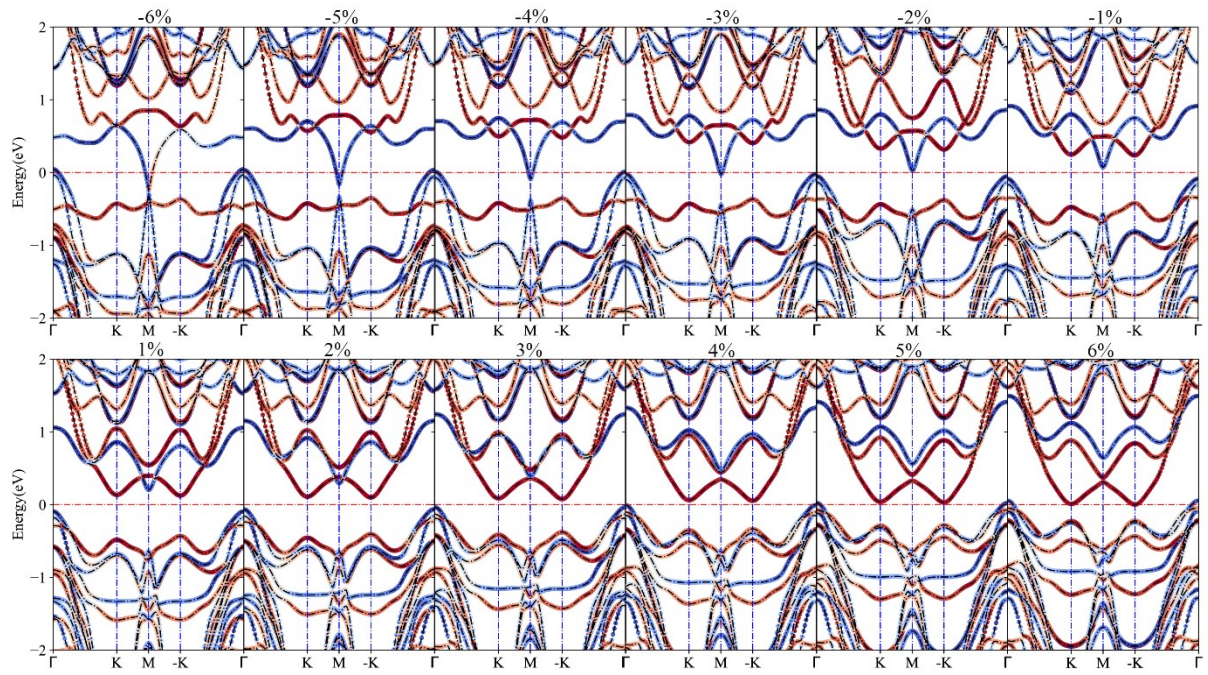

**Fig. S6** Band structures of VSeTe/Sc<sub>2</sub>CO<sub>2</sub> (Te-Sc↓) heterostructures regulated by strain.
